# Supplementary material
Source: publisher figshare collection journal article supplement (https://tandf.figshare.com/articles/dataset/_/12032718)
Supplement: Supplementary file 1 [file 1]

Archive with 2 entries (2 files):
- tnzm_a_1745854_sm8247.pdf
- tnzm_a_1745854_sm8246.pdf
