# Supplementary material
Source: publisher figshare collection journal article supplement (https://tandf.figshare.com/articles/dataset/_/12032718)
Supplement: Supplementary file 1 [file 1 › tnzm_a_1745854_sm8246.pdf]

## Supplementary material

### ***DNA Extraction***

DNA was extracted from caudal fin clips (1mm x 2mm) using Chelex 100 resin (BioRad) following a modification of Casquet et al. (2012). Caudal fin tissue was placed into individual 1.5ml tubes containing 400µl of 5% Chelex and 40mg proteinase K. Following an overnight incubation, tubes were heated to 90°C for 10 minutes then centrifuged at ~20,000 x g for 10 minutes.

### ***PCR Amplification and sequencing***

Approximately 1200bp of mitochondrial cytochrome b was amplified using primers situated in the flanking tRNAs; cytb-glu and cytb-thr (Waters et al. 2001). PCRs contained 0.5µM each primer and 1 x MyFi Mix (Bioline) in a total volume of 10µl and were cycled in an Eppendorf Mastercycler Pro S thermocycler: 94°C for 120 s, followed by 35 cycles of 94°C for 30 s, 47°C for 30 s, 72°C for 60 s, with a final extension of 72°C for 240 s.

Two microliters of amplified DNA was visualised on a 1% agarose gel containing SYBR safe (Thermo Fisher) using a blue LED transilluminator (UVI). The remaining DNA was purified using a MEGA quick-spin total fragment DNA purification kit (iNtRON) and quantified using a Nanodrop ND-1000 spectrophotometer (Thermo Fisher). Purified DNA was sequenced using primer cytb-glu on an ABI 3730xl DNA Analyser), producing up to 930bp of useable sequence after editing.

### ***Species identification***

Species identification was diagnosed using BLAST searches of the NCBI GenBank database (Altschul et al. 1990), and confirmed by aligning the sequences to a large dataset containing reference sequences and subsequent Neighbour-Joining tree building. Due to very limited sequence information in GenBank for *Galaxias argenteus*, close matches to this species were found only when a shortened fragment of the unknown DNA sequences was used.

## References

- Casquet J, Thebaud C, Gillespie RG. 2012. Chelex without boiling, a rapid and easy technique to obtain stable amplifiable DNA from small amounts of ethanol-stored spiders. *Mol Ecol Resour.* 12(1):136-141.
- Waters JM, Craw D, Youngson JH, Wallis GP. 2001. Genes meet geology: fish phylogeographic pattern reflects ancient, rather than modern, drainage connections. *Evolution.* 55(9):1844-1851.
- Altschul SF, Gish W, Miller W, Myers EW, Lipman DJ. 1990. Basic local alignment search tool. *J Mol Biol.* 215(3):403-410.
