# Supplementary material
Source: publisher figshare collection journal article supplement (https://tandf.figshare.com/articles/dataset/_/12032718)
Supplement: Supplementary file 1 [file 1 › tnzm_a_1745854_sm8247.pdf]

Table S1. The region, latitude and longitude (°) of rivers where whitebait samples (>100 fish) were collected. The number and date of samples is shown.

| Region        | River        | Latitude | Longitude | Samples | Sampling date                                                                    |
|---------------|--------------|----------|-----------|---------|----------------------------------------------------------------------------------|
| Auckland      | Hoteo        | -36.430  | 174.429   | 3       | 15/10, 2/11, 19/11                                                               |
| Coromandel    | Wentworth    | -37.196  | 175.865   | 4       | 7/10, 2/11, 7/11, 15/11                                                          |
| Waikato       | Waikato      | -37.361  | 174.695   | 13      | 15/8, 16/8, 12/9, 14/9, 25/9, 2/10, 9/10, 24/10, 29/10, 4/11, 9/11, 23/11, 23/11 |
|               | Waingaro     | -37.742  | 174.955   | 4       | 2/10, 30/10, 13/11, 27/11                                                        |
|               | Oparau       | -38.066  | 174.891   | 2       | 1/10, 15/10                                                                      |
|               | Marokopa     | -38.308  | 174.714   | 3       | 23/9, 7/10, 2/11                                                                 |
|               | Waikawau     | -38.479  | 174.636   | 4       | 24/9, 4/10, 26/10, 8/11                                                          |
|               | Awakino      | -38.665  | 174.620   | 2       | 17/7, 17/8                                                                       |
|               | Mokau        | -38.705  | 174.614   | 13      | 15/7, 17/7, 1/8, 1/8, 18/8, 1/9, 4/9, 15/9, 17/9, 2/10, 2/10, 18/11, 2/12        |
| Bay of Plenty | Tuapiro      | -37.495  | 175.929   | 1       | 8/10                                                                             |
|               | Whangaparaoa | -37.569  | 177.992   | 2       | 20/8, 1/9                                                                        |
|               | Kaituna      | -37.748  | 176.415   | 8       | 22/7, 3/8, 20/8, 6/9, 23/9, 8/10, 5/11, 18/11                                    |
|               | Tarawera     | -37.890  | 176.788   | 1       | 7/09                                                                             |
|               | Rangitaiki   | -37.909  | 176.882   | 3       | 30/8, 5/9, 6/10                                                                  |
|               | Whakatane    | -37.943  | 177.010   | 5       | 23/7, 1/9, 10/9, 15/9, 5/10                                                      |
|               | Waiaua       | -37.983  | 177.389   | 1       | 15/10                                                                            |
|               | Waiotahi     | -37.991  | 177.208   | 1       | 12/10                                                                            |
|               | Otara        | -38.001  | 177.280   | 1       | 6/10                                                                             |
|               | Nukuhou      | -38.018  | 177.108   | 2       | 22/7, 2/8                                                                        |
| Taranaki      | Waitara      | -38.988  | 174.229   | 1       | 22/09                                                                            |
|               | Onaero       | -38.993  | 174.364   | 2       | 10/9, 24/09                                                                      |
|               | Waingongoro  | -39.586  | 174.193   | 1       | 27/09                                                                            |

|               |                  |         |         |    |                                                                         |
|---------------|------------------|---------|---------|----|-------------------------------------------------------------------------|
| Manawatu      | Kai Iwi          | -39.885 | 174.898 | 2  | 28/09, 30/11                                                            |
|               | Whangaehu        | -40.041 | 175.100 | 1  | 7/10                                                                    |
|               | Rangitikei       | -40.298 | 175.223 | 7  | 9/9, 16/9, 1/10, 17/10, 2/11, 17/11, 19/11                              |
|               | Manawatu         | -40.482 | 175.209 | 1  | 4/09                                                                    |
|               | Owahanga         | -40.680 | 176.351 | 1  | 17/11                                                                   |
| Hawkes Bay    | Wairoa           | -39.063 | 177.417 | 4  | 5/10, 12/10, 2/11, 10/11                                                |
|               | Tūtaekurī        | -39.566 | 176.914 | 7  | 19/8, 27/9, 7/10, 8/10, 22/10, 4/11, 13/11                              |
|               | Clive            | -39.572 | 176.926 | 1  | 9/10                                                                    |
|               | Tukituki         | -39.598 | 176.945 | 1  | 4/09                                                                    |
|               | Pōrangahau       | -40.277 | 176.674 | 2  | 8/10, 27/10                                                             |
| Wellington    | Otaki            | -40.759 | 175.103 | 1  | 20/10                                                                   |
|               | Peka Peka        | -40.826 | 175.061 | 1  | 18/10                                                                   |
|               | Waikanae         | -40.873 | 175.003 | 1  | 3/10                                                                    |
|               | Pauatahanui      | -41.103 | 174.910 | 2  | 14/10, 24/10                                                            |
|               | Hutt             | -41.241 | 174.899 | 1  | 30/09                                                                   |
|               | Lake Ferry       | -41.396 | 175.141 | 1  | 30/11                                                                   |
| Wairarapa     | Whareama         | -41.016 | 176.107 | 1  | 31/08                                                                   |
| Tasman-Nelson | Aorere           | -40.674 | 172.677 | 1  | 13/10                                                                   |
|               | Wainui           | -40.812 | 172.941 | 2  | 2/10, 19/10                                                             |
|               | Takaka           | -40.818 | 172.802 | 10 | 5/7, 17/7, 1/8, 18/8, 2/9, 15/9, 1/10, 16/10, 2/11, 18/11, 30/11, 17/12 |
|               | Motueka          | -41.081 | 173.023 | 1  | 31/07                                                                   |
| Marlborough   | Wairau Diversion | -41.441 | 174.031 | 6  | 3/9, 4/10, 15/10, 5/11, 17/11, 28/11                                    |
|               | Wairau           | -41.504 | 174.050 | 1  | 13/10                                                                   |
|               | Ōpaoa            | -41.506 | 174.051 | 1  | 24/10                                                                   |

|            |                 |         |         |   |                                                    |
|------------|-----------------|---------|---------|---|----------------------------------------------------|
| Buller     | Oparara         | -41.214 | 172.102 | 2 | 25/10, 11/10                                       |
|            | Karamea         | -41.258 | 172.097 | 5 | 15/9, 6/10, 21/10, 5/11, 14/11                     |
|            | Little Wanganui | -41.391 | 172.055 | 2 | 24/9, 6/10                                         |
|            | Mokihinui       | -41.522 | 171.937 | 4 | 26/9, 11/10, 21/10, 17/11                          |
|            | Buller          | -41.730 | 171.589 | 7 | 18/8, 7/9, 18/9, 4/10, 31/10, 2/11, 18/11          |
|            | Orowaiti        | -41.739 | 171.670 | 3 | 15/9, 9/10, 9/11                                   |
|            | Okari           | -41.810 | 171.460 | 1 | 19/09                                              |
|            | Punakaiki       | -42.124 | 171.329 | 2 | 18/11, 15/12                                       |
| Canterbury | Lyell           | -42.404 | 173.685 | 1 | 18/11                                              |
|            | Kowhai          | -42.419 | 173.633 | 1 | 21/11                                              |
|            | Saltwater       | -43.269 | 172.724 | 6 | 28/8, 16/9, 28/10, 12/11, 23/11, 23/12             |
|            | Ashley          | -43.274 | 172.724 | 6 | 21/9, 29/9, 30/9, 10/10, 31/10, 26/11              |
|            | Waimakariri     | -43.391 | 172.702 | 8 | 12/9, 24/9, 11/10, 25/10, 5/11, 21/11, 6/12, 20/12 |
|            | Styx            | -43.397 | 172.704 | 1 | 27/08                                              |
|            | Avon            | -43.527 | 172.726 | 8 | 4/8, 23/8, 5/9, 27/9, 9/11, 9/11, 23/11, 21/12     |
|            | Heathcote       | -43.558 | 172.709 | 1 | 24/11                                              |
|            | Okains          | -43.691 | 173.060 | 1 | 24/10                                              |
|            | Pawsons         | -43.751 | 172.931 | 1 | 21/10                                              |
|            | Robinsons Bay   | -43.764 | 172.962 | 1 | 25/10                                              |
|            | Orari           | -44.243 | 171.408 | 1 | 10/11                                              |
|            | Opihi           | -44.282 | 171.349 | 1 | 2/11                                               |
|            | Waihao          | -44.772 | 171.171 | 1 | 29/11                                              |

|           |           |         |         |    |                                                                                         |
|-----------|-----------|---------|---------|----|-----------------------------------------------------------------------------------------|
| Westland  | Taramakau | -42.562 | 171.127 | 1  | 14/09                                                                                   |
|           | Waimea    | -42.631 | 171.071 | 1  | 28/11                                                                                   |
|           | Hokitika  | -42.724 | 170.950 | 7  | 6/7, 23/7, 14/9, 12/10, 30/10, 14/11, 14/11                                             |
|           | Wanganui  | -43.036 | 170.426 | 6  | 16/9, 28/9, 11/10, 28/10, 8/11, 19/11                                                   |
|           | Okarito   | -43.219 | 170.166 | 2  | 16/9, 30/10                                                                             |
|           | Paringa   | -43.632 | 169.434 | 5  | 16/9, 1/10, 13/10, 4/11, 10/11                                                          |
|           | Waiatoto  | -43.976 | 168.788 | 14 | 21/8, 7/9, 8/9, 19/9, 1/10, 7/10, 16/10, 30/10, 7/11, 12/11, 12/11, 13/11, 21/11, 18/12 |
|           | Cascade   | -44.030 | 168.363 | 6  | 8/9, 21/9, 8/10, 21/10, 5/11, 13/11                                                     |
| Otago     | Waitaki   | -44.937 | 171.147 | 3  | 28/10, 2/11, 22/11                                                                      |
|           | Kakanui   | -45.188 | 170.899 | 2  | 28/10, 30/11                                                                            |
|           | Shag      | -45.480 | 170.819 | 1  | 28/10                                                                                   |
|           | Taeri     | -46.054 | 170.202 | 4  | 29/10, 3/11, 17/11, 20/11                                                               |
|           | Owaka     | -46.472 | 169.700 | 1  | 30/10                                                                                   |
| Southland | Waiau     | -46.195 | 167.615 | 10 | 2/8, 13/8, 2/9, 17/9, 1/10, 9/10, 21/10, 1/11, 15/11, 26/11                             |
|           | Aparima   | -46.342 | 168.010 | 7  | 7/8, 18/8, 3/9, 17/9, 1/10, 15/10, 2/11                                                 |
|           | Oreti     | -46.462 | 168.301 | 7  | 1/8, 10/8, 23/8, 1/9, 12/9, 28/9, 21/10                                                 |
|           | Titiroa   | -46.564 | 168.784 | 5  | 16/8, 17/8, 1/9, 12/9, 12/9                                                             |
|           | Mataura   | -46.572 | 168.778 | 8  | 1/8, 16/8, 1/9, 18/9, 23/10, 28/10, 1/11, 30/11                                         |
|           | Waikawa   | -46.608 | 169.129 | 2  | 2/11, 11/11                                                                             |
